# Supplementary material for: DNMT1 inhibition improves the activity of memory-like natural killer cells by enhancing the level of autophagy
Source: PubMed Central journal article supplement — Mol Biol Rep. 2024 Dec 20;52(1):68. doi: 10.1007/s11033-024-10181-9 (PMC11662054; doi:10.1007/s11033-024-10181-9), 2024-12-20
Supplement: 11033_2024_10181_MOESM1_ESM.pdf [file 11033_2024_10181_MOESM1_ESM.pdf]

Figure 2A-Control-NK

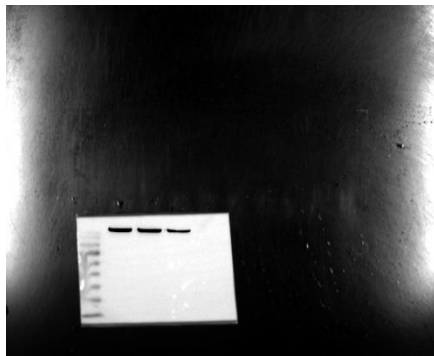

DNMT1

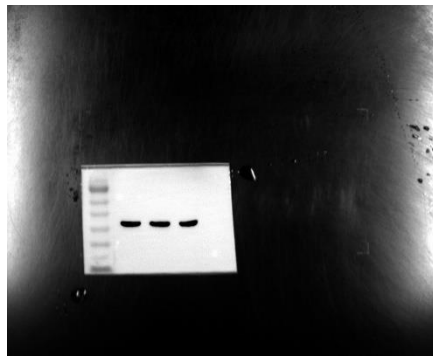

GAPDH

Figure 2A-CIML-NK

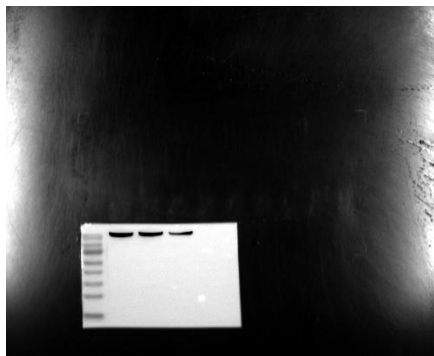

DNMT1

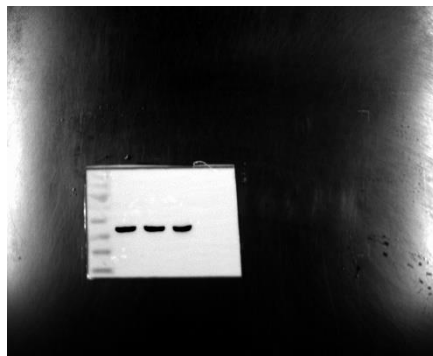

GAPDH

Figure 4A

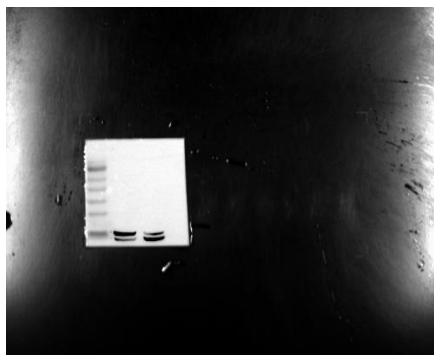

LC3

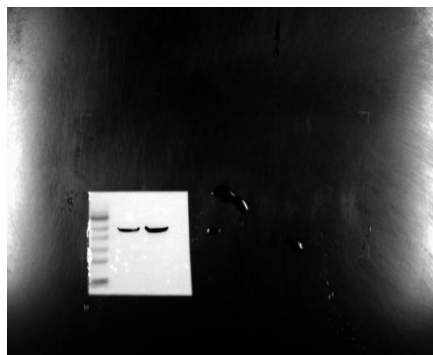

Beclin1

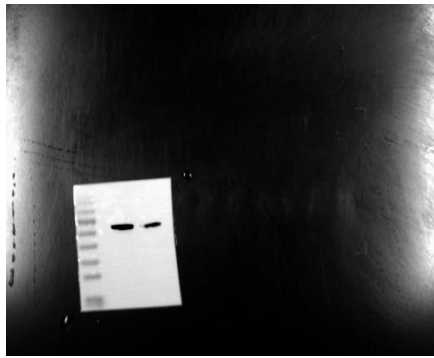

P62

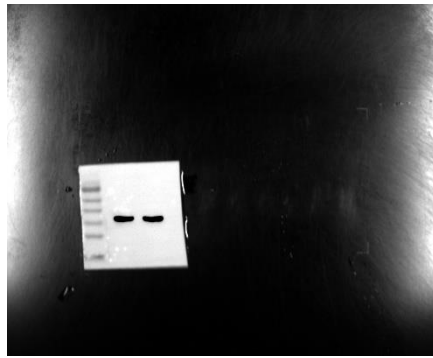

GAPDH

Figure 4B

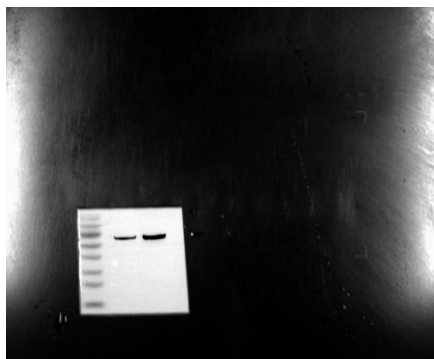

p-AMPK

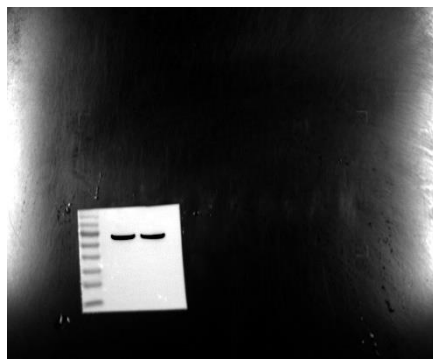

AMPK

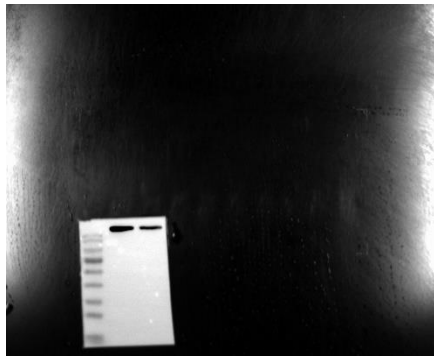

p-mTOR

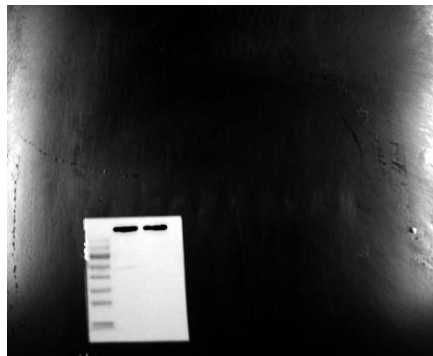

mTOR

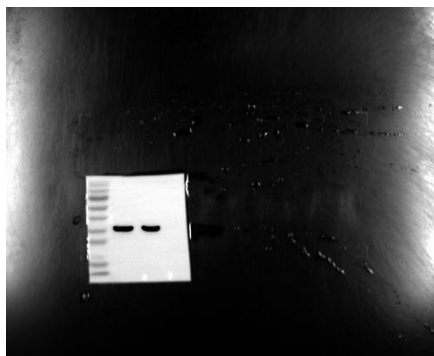

GAPDH
